# Supplementary material for: Exome Sequencing of ABCB5 Identifies Recurrent Melanoma Mutations that Result in Increased Proliferative and Invasive Capacities
Source: PubMed Central journal article supplement — J Invest Dermatol. Author manuscript; Available in PMC 2019 Sep 1. (PMC6708748; doi:10.1016/j.jid.2019.01.036), 2019-03-21
Supplement: NIHMS1039541-supplement-SUPP_TABLE_S1.pdf [file NIHMS1039541-supplement-SUPP_TABLE_S1.pdf]

Supplementary Table S1. ABCB5 Mutations in 487 Samples<sup>1</sup>

| Gene                         | Sample                       | Mutation    | Mutation Type   |
|------------------------------|------------------------------|-------------|-----------------|
| NM_001163941.1               | 12T                          | I828I       | Silent          |
|                              | 17T                          | Q187*       | Nonsense        |
|                              | 2427TIL                      | S979F       | Missense        |
|                              | 24T                          | S1091F      | Missense        |
|                              | 2556TIL                      | V827I       | Missense        |
|                              | 2556TIL                      | S830F       | Missense        |
|                              | 32T                          | S1184P      | Missense        |
|                              | 55T                          | E520D       | Missense        |
|                              | 55T                          | Q1098*      | Nonsense        |
|                              | D35                          | G598E       | Missense        |
|                              | LAU165                       | E1083fs     | Frame_Shift_Ins |
|                              | LAU50_1&2                    | F739F       | Silent          |
|                              | ME012                        | F751F       | Silent          |
|                              | ME044                        | G485R       | Missense        |
|                              | MEL-JWCI-14-Tumor            | D44N        | Missense        |
|                              | MEL-JWCI-14-Tumor            | D780N       | Missense        |
|                              | MEL-JWCI-WGS-11-Tumor        | F1022S      | Missense        |
|                              | MEL-JWCI-WGS-12-Tumor        | A497T       | Missense        |
|                              | MEL-JWCI-WGS-18-Tumor        | Q779*       | Nonsense        |
|                              | MEL-JWCI-WGS-1-Tumor         | G1055G      | Silent          |
|                              | MEL-JWCI-WGS-22-Tumor        | D780N       | Missense        |
|                              | MEL-JWCI-WGS-8-Tumor         | V1210V      | Silent          |
|                              | MEL-Ma-Mel-08a-Tumor         | I507I       | Silent          |
|                              | MEL-Ma-Mel-119-Tumor         | F1023F      | Silent          |
|                              | MEL-Ma-Mel-65-Tumor          | S830F       | Missense        |
|                              | MEL-Ma-Mel-67-Tumor          | N883K       | Missense        |
|                              | MEL-Ma-Mel-94-Tumor          | P647L       | Missense        |
|                              | MEL-UKRV-Mel-24-Tumor        | Q779*       | Nonsense        |
|                              | TCGA-BF-A3DL-01A-11D-A20D-08 | S983L       | Missense        |
|                              | TCGA-D3-A3MR-06A-11D-A21A-08 | S638L       | Missense        |
|                              | TCGA-D9-A148-06A-11D-A19A-08 | S638L       | Missense        |
|                              | TCGA-D9-A149-06A-11D-A196-08 | R587Q       | Missense        |
|                              | TCGA-D9-A1JX-06A-11D-A19A-08 | I577I       | Silent          |
|                              | TCGA-DA-A1HY-06A-11D-A19A-08 | F751F       | Silent          |
|                              | TCGA-DA-A1I5-06A-11D-A197-08 | H926Y       | Missense        |
|                              | TCGA-DA-A1I7-06A-22D-A197-08 | R1027C      | Missense        |
|                              | TCGA-EB-A24D-01A-11D-A197-08 | G179R       | Missense        |
|                              | TCGA-EE-A180-06A-11D-A21A-08 | G721E       | Missense        |
|                              | TCGA-EE-A181-06A-11D-A196-08 | R587Q       | Missense        |
|                              | TCGA-EE-A181-06A-11D-A196-08 | G758C       | Missense        |
|                              | TCGA-EE-A182-06A-11D-A196-08 | N1133I      | Missense        |
|                              | TCGA-EE-A20B-06A-11D-A196-08 | S645S       | Silent          |
|                              | TCGA-EE-A20H-06A-11D-A197-08 | K980I       | Missense        |
|                              | TCGA-EE-A29D-06A-11D-A197-08 | E520K       | Missense        |
|                              | TCGA-EE-A29D-06A-11D-A197-08 | G754E       | Missense        |
|                              | TCGA-EE-A29D-06A-11D-A197-08 | G814S       | Missense        |
|                              | TCGA-EE-A29D-06A-11D-A197-08 | F896F       | Silent          |
|                              | TCGA-EE-A29D-06A-11D-A197-08 | D1187N      | Missense        |
| TCGA-EE-A29E-06A-11D-A197-08 | D624_splice                  | Splice_Site |                 |
| TCGA-EE-A29M-06A-11D-A196-08 | P674S                        | Missense    |                 |
| TCGA-EE-A29M-06A-11D-A196-08 | I805F                        | Missense    |                 |
| TCGA-EE-A29W-06A-11D-A196-08 | G1229E                       | Missense    |                 |
| TCGA-EE-A2GC-06A-11D-A197-08 | R587*                        | Nonsense    |                 |
| TCGA-EE-A2GC-06A-11D-A197-08 | G1055G                       | Silent      |                 |
| TCGA-EE-A2GI-06A-11D-A196-08 | A895A                        | Silent      |                 |
| TCGA-EE-A2GL-06A-11D-A196-08 | R587Q                        | Missense    |                 |
| TCGA-EE-A2GO-06A-11D-A196-08 | R1027C                       | Missense    |                 |
| TCGA-EE-A2MI-06A-11D-A197-08 | G1005G                       | Silent      |                 |

(continued)

Supplementary Table S1. Continued

| Gene           | Sample                       | Mutation | Mutation Type |
|----------------|------------------------------|----------|---------------|
|                | TCGA-EE-A2MJ-06A-11D-A197-08 | S710F    | Missense      |
|                | TCGA-EE-A2MR-06A-11D-A196-08 | R613Q    | Missense      |
|                | TCGA-EE-A2MS-06A-11D-A197-08 | G1005G   | Silent        |
|                | TCGA-EE-A2MS-06A-11D-A197-08 | R1168K   | Missense      |
|                | TCGA-EE-A3AA-06A-11D-A196-08 | P647S    | Missense      |
|                | TCGA-EE-A3AE-06A-11D-A196-08 | M949I    | Missense      |
|                | TCGA-EE-A3AG-06A-31D-A196-08 | M525I    | Missense      |
|                | TCGA-EE-A3J5-06A-11D-A20D-08 | E869E    | Silent        |
|                | TCGA-FS-A1Z7-06A-11D-A197-08 | R486Q    | Missense      |
|                | TCGA-FS-A1ZB-06A-12D-A197-08 | S638S    | Silent        |
|                | TCGA-FS-A1ZK-06A-11D-A197-08 | R138R    | Silent        |
|                | TCGA-FS-A1ZK-06A-11D-A197-08 | P1121L   | Missense      |
|                | TCGA-FS-A1ZM-06A-12D-A197-08 | E630K    | Missense      |
|                | TCGA-FS-1ZZ-06A-11D-A197-08  | D629N    | Missense      |
|                | TCGA-GN-A265-06A-21D-A197-08 | R938Q    | Missense      |
|                | TCGA-GN-A266-06A-11D-A197-08 | D597N    | Missense      |
|                | TCGA-GN-A269-01A-11D-A19A-08 | S830F    | Missense      |
|                | TCGA-IH-A3EA-01A-11D-A20D-08 | S811F    | Missense      |
| NM_001163941.1 | YUAVEY                       | R587Q    | Missense      |
|                | YUDAB                        | S830F    | Missense      |
|                | YUDUTY                       | M737I    | Missense      |
|                | YUGISMO                      | G947E    | Missense      |
|                | YUGOE                        | R587*    | Nonsense      |
|                | YUMER                        | S912L    | Missense      |
|                | YUPROST                      | S650F    | Missense      |
|                | YURTHE                       | F1137L   | Missense      |
|                | YURUS                        | D597N    | Missense      |

<sup>†</sup>Results from mutational data in published studies (Berger et al., 2012; Hodis et al., 2012; Krauthammer et al., 2012; Nikolaev et al., 2011; Stark et al., 2011; Wei et al., 2011) combined with The Cancer Genome Atlas exome data.
