# Supplementary material for: Exome Sequencing of ABCB5 Identifies Recurrent Melanoma Mutations that Result in Increased Proliferative and Invasive Capacities
Source: PubMed Central journal article supplement — J Invest Dermatol. Author manuscript; Available in PMC 2019 Sep 1. (PMC6708748; doi:10.1016/j.jid.2019.01.036), 2019-03-21
Supplement: NIHMS1039541-supplement-SUPP_TABLE_S2.pdf [file NIHMS1039541-supplement-SUPP_TABLE_S2.pdf]

Supplementary Table S2. Clinical Sample Information

| Sample            | Patient Age in Years <sup>1</sup> | Patient Sex | Characteristic         | Primary Tumor Site  | Metastatic Tumor Site        | Matched Normal Source |
|-------------------|-----------------------------------|-------------|------------------------|---------------------|------------------------------|-----------------------|
| 1T <sup>2</sup>   | 29                                | F           | Cutaneous              | Posterior neck      | Lung                         | Blood                 |
| 5T <sup>2</sup>   | 47                                | M           | Cutaneous              | Lower abdomen       | Iliac                        | Blood                 |
| 6T                | 42                                | M           | Cutaneous              | Temple              | Neck, soft tissue            | Blood                 |
| 7T <sup>2</sup>   | 53                                | M           | Cutaneous              | Knee                | Stomach                      | Blood                 |
| 8T <sup>2</sup>   | 61                                | M           | Cutaneous              | Thigh               | Inguinal                     | Blood                 |
| 9T <sup>2</sup>   | 62                                | M           | Cutaneous              | Mid-back            | Back, subcutaneous           | Blood                 |
| 12T <sup>2</sup>  | 53                                | M           | Cutaneous              | Arm                 | Upper arm, subcutaneous      | Blood                 |
| 14T <sup>2</sup>  | 58                                | F           | Cutaneous              | Foot                | Small bowel                  | Blood                 |
| 16T               | 62                                | M           | Cutaneous              | Scalp               | Lung                         | Blood                 |
| 17T <sup>2</sup>  | 33                                | M           | Cutaneous              | Unknown             | Shoulder, subcutaneous       | Blood                 |
| 18T <sup>2</sup>  | 55                                | M           | Cutaneous              | Upper back          | Clavicle, soft tissue        | Blood                 |
| 20T               | 58                                | F           | Cutaneous              | Shoulder            | Axilla                       | Blood                 |
| 22T <sup>†</sup>  | 51                                | M           | Cutaneous              | Nipple              | Chest wall, subcutaneous     | Blood                 |
| 23T <sup>2</sup>  | 44                                | M           | Cutaneous              | Scalp               | Lung                         | Blood                 |
| 24T <sup>2</sup>  | 49                                | M           | Cutaneous              | Upper arm           | Axilla                       | Blood                 |
| 26T <sup>2</sup>  | 48                                | F           | Cutaneous              | Upper thigh         | Lung                         | Blood                 |
| 29T               | 51                                | M           | Cutaneous              | Thigh               | Inguinal                     | Blood                 |
| 32T <sup>2</sup>  | 58                                | M           | Cutaneous              | Shoulder            | Omentum                      | Blood                 |
| 35T <sup>2</sup>  | 23                                | F           | Cutaneous <sup>3</sup> | Heel                | Thigh, subcutaneous          | Blood                 |
| 43T <sup>2</sup>  | 19                                | F           | Cutaneous              | Thigh               | Popliteal soft tissue        | Blood                 |
| 44T               | 56                                | M           | Cutaneous              | Mid-back            | Lung                         | Blood                 |
| 51T <sup>2</sup>  | 50                                | F           | Cutaneous              | Medial thigh        | Adnexa                       | Blood                 |
| 55T <sup>2</sup>  | 60                                | M           | Cutaneous              | Neck                | Lung                         | Blood                 |
| 56T <sup>2</sup>  | 52                                | M           | Cutaneous              | Thigh               | Lung                         | Blood                 |
| 60T <sup>2</sup>  | 46                                | M           | Cutaneous              | Abdomen             | Flank, subcutaneous          | Blood                 |
| 64T <sup>2</sup>  | 32                                | F           | Cutaneous              | Unknown             | Ovary                        | Blood                 |
| 79T               | 53                                | M           | Cutaneous              | Mid-back            | Supraclavicular, soft tissue | Blood                 |
| 81T <sup>2</sup>  | 60                                | F           | Cutaneous              | Arm                 | Upper arm, subcutaneous      | Blood                 |
| 83T               | 33                                | F           | Cutaneous              | Arm                 | Back, subcutaneous           | Blood                 |
| 84T               | 60                                | F           | Cutaneous              | Calf                | Thigh, subcutaneous          | Blood                 |
| 86T               | 42                                | F           | Cutaneous              | Forearm             | Liver                        | Blood                 |
| 88T <sup>2</sup>  | 37                                | F           | Cutaneous              | Scalp               | Chest wall, subcutaneous     | Blood                 |
| 90T               | 19                                | M           | Cutaneous              | Occipital scalp     | Neck, soft tissue            | Blood                 |
| 91T <sup>2</sup>  | 55                                | F           | Cutaneous              | Shoulder            | Subcostal soft tissue        | Blood                 |
| 92T               | 37                                | F           | Cutaneous              | Inguinal            | Femur                        | Blood                 |
| 93T <sup>2</sup>  | 42                                | F           | Cutaneous              | Finger              | Axilla                       | Blood                 |
| 95T               | 58                                | F           | Cutaneous              | Unknown             | Inguinal                     | Blood                 |
| 96T <sup>2</sup>  | 49                                | M           | Cutaneous              | Unknown             | Inguinal                     | Blood                 |
| 105T              | 28                                | M           | Cutaneous              | Upper back          | Neck, soft tissue            | Blood                 |
| 108T <sup>2</sup> | 25                                | F           | Cutaneous              | Heel                | Thigh, subcutaneous          | Blood                 |
| 109T              | 58                                | M           | Cutaneous              | Shoulder            | Scrotum                      | Blood                 |
| 110T              | 51                                | M           | Cutaneous              | Unknown             | Axilla                       | Blood                 |
| 111T              | 41                                | M           | Cutaneous              | Mid-upper back      | Axilla                       | Blood                 |
| 112T              | 46                                | M           | Cutaneous              | Lower back          | Inguinal                     | Blood                 |
| 113T              | 38                                | M           | Cutaneous              | Posterior shoulder  | Axilla                       | Blood                 |
| 114T              | 22                                | M           | Cutaneous              | Unknown             | Adrenal gland                | Blood                 |
| 116T              | 29                                | M           | Cutaneous              | Leg                 | Thigh, subcutaneous          | Blood                 |
| 117T              | 44                                | M           | Cutaneous              | Posterior lower leg | Chest wall, subcutaneous     | Blood                 |
| 119T              | 45                                | M           | Cutaneous              | Chest               | Axilla                       | Blood                 |
| 122T              | 60                                | F           | Cutaneous              | Back                | Lung                         | Blood                 |
| 123T              | 51                                | M           | Cutaneous              | Unknown             | Anticubital                  | Blood                 |
| 124T              | 44                                | M           | Cutaneous              | Back                | Inguinal                     | Blood                 |
| 125T              | 27                                | M           | Cutaneous              | Upper back          | Axilla                       | Blood                 |
| 130T <sup>2</sup> | 49                                | F           | Cutaneous              | Lower extremity     | Thigh, subcutaneous          | Blood                 |

Abbreviations: F, female; L, left; LN, lymph node; M, male; R, right.

<sup>1</sup>Patient's age when tumor was surgically removed.<sup>2</sup>Samples used in exome/genome sequencing.<sup>3</sup>Acral lentiginous.
