# Supplementary material for: Exome Sequencing of ABCB5 Identifies Recurrent Melanoma Mutations that Result in Increased Proliferative and Invasive Capacities
Source: PubMed Central journal article supplement — J Invest Dermatol. Author manuscript; Available in PMC 2019 Sep 1. (PMC6708748; doi:10.1016/j.jid.2019.01.036), 2019-03-21
Supplement: NIHMS1039541-supplement-SUPP_TABLE_S3.pdf [file NIHMS1039541-supplement-SUPP_TABLE_S3.pdf]

## Supplementary Table S3. PCR primer sequences

| Sequence Name                               | Sequence                                      |
|---------------------------------------------|-----------------------------------------------|
| Forward primers                             |                                               |
| NM_001163941_cds_1_0_chr7_20629434_f.fwd    | TGTA AACGACGGCCAGTGATGCTTCCTTTTCAA ACTGTG     |
| NM_001163941_cds_2_0_chr7_20632705_f.fwd    | TGTA AACGACGGCCAGTCAAGTTTACAGACA ACCAGTGACAA  |
| NM_001163941_cds_3_0_chr7_20634836_f_1.fwd  | TGTA AACGACGGCCAGTTGATTTTATGC ACTTATTTACCATC  |
| NM_001163941_cds_4_0_chr7_20638207_f.fwd    | TGTA AACGACGGCCAGTCTGCGTGTGGGCAGTAAAT         |
| NM_001163941_cds_5_0_chr7_20649332_f_1.fwd  | TGTA AACGACGGCCAGTCACTCTATGTTTACAGGAAACCT     |
| NM_001163941_cds_6_0_chr7_20649609_f_1.fwd  | TGTA AACGACGGCCAGTTGTTGCTGCCTTGATTTTTG        |
| NM_001163941_cds_6_0_chr7_20649609_f_2.fwd  | TGTA AACGACGGCCAGTTCAGTGATGGTATTGGAGATAAGA    |
| NM_001163941_cds_7_0_chr7_20651904_f_1.fwd  | TGTA AACGACGGCCAGTAGGTA AACCTGTCTAGTACCAA     |
| NM_001163941_cds_8_0_chr7_20652109_f_1.fwd  | TGTA AACGACGGCCAGTGGTCATCTCATTGACCAGTAAGG     |
| NM_001163941_cds_8_0_chr7_20652109_f_2.fwd  | TGTA AACGACGGCCAGTTGTCTCTTGGTGCTGTGTACTTC     |
| NM_001163941_cds_9_0_chr7_20653683_f_1.fwd  | TGTA AACGACGGCCAGTGGTCATATCTCCATTCTTCTTACC    |
| NM_001163941_cds_10_0_chr7_20654116_f_1.fwd | TGTA AACGACGGCCAGTAAGAGGAGATTGTGTTGTATTGAAA   |
| NM_001163941_cds_11_0_chr7_20656170_f_1.fwd | TGTA AACGACGGCCAGTTGTACATGAAACAAACATAACAAGA   |
| NM_001163941_cds_12_0_chr7_20657568_f_1.fwd | TGTA AACGACGGCCAGTGGTGCCCATCTACCAGAAAA        |
| NM_001163941_cds_12_0_chr7_20657568_f_2.fwd | TGTA AACGACGGCCAGTCCATTTGGAGTGGTTAGTCAAGA     |
| NM_001163941_cds_13_0_chr7_20664654_f_1.fwd | TGTA AACGACGGCCAGTAGCACCCAGAGGCTGAAGTA        |
| NM_001163941_cds_14_0_chr7_20687653_f_1.fwd | TGTA AACGACGGCCAGTTTTCTTAAACAGTGCAAAGGTTGT    |
| NM_001163941_cds_15_0_chr7_20691844_f_1.fwd | TGTA AACGACGGCCAGTGAAGCTGTTTACAGCAAGACTACA    |
| NM_001163941_cds_16_0_chr7_20704555_f_1.fwd | TGTA AACGACGGCCAGTACAATAGTCACTTGTGGCAA        |
| NM_001163941_cds_17_0_chr7_20705973_f_1.fwd | TGTA AACGACGGCCAGTAAATTTTCACTTTTTCTGTTTCTTT   |
| NM_001163941_cds_18_0_chr7_20706206_f.fwd   | TGTA AACGACGGCCAGTTGATATTCGTCA TTTTGGGTGT     |
| NM_001163941_cds_19_0_chr7_20710872_f.fwd   | TGTA AACGACGGCCAGTGGTGATGAGTAATGAGTCCAAGC     |
| NM_001163941_cds_20_0_chr7_20729164_f_1.fwd | TGTA AACGACGGCCAGTCTCAAAGTATAAATTC AAGGCATAAA |
| NM_001163941_cds_20_0_chr7_20729164_f_2.fwd | TGTA AACGACGGCCAGTCAAATGCAACTAACATGGGACT      |
| NM_001163941_cds_21_0_chr7_20733188_f_1.fwd | TGTA AACGACGGCCAGTGTGAGTGAGTGAATTCACAATGG     |
| NM_001163941_cds_22_0_chr7_20734463_f_1.fwd | TGTA AACGACGGCCAGTGACCTTGTCTATAATTCAGCTCA     |
| NM_001163941_cds_23_0_chr7_20745131_f_1.fwd | TGTA AACGACGGCCAGTTGGTGGGTCTTACGCGTTAG        |
| NM_001163941_cds_23_0_chr7_20745131_f_2.fwd | TGTA AACGACGGCCAGTCTCGTTTTGGTCTCTGAAT         |
| NM_001163941_cds_24_0_chr7_20749025_f_1.fwd | TGTA AACGACGGCCAGTAACAAAAGTGACAGAAACCCACT     |
| NM_001163941_cds_24_0_chr7_20749025_f_2.fwd | TGTA AACGACGGCCAGTCAACCTTCCCAAGTCATTCTTC      |
| NM_001163941_cds_25_0_chr7_20751380_f_1.fwd | TGTA AACGACGGCCAGTTGAGCCTTCTTGGGTA ACT        |
| NM_001163941_cds_25_0_chr7_20751380_f_2.fwd | TGTA AACGACGGCCAGTAGCCTGTGCTCTTCAACTG         |
| NM_001163941_cds_26_0_chr7_20759508_f_1.fwd | TGTA AACGACGGCCAGTTGCAACAAAGCCCAAGAATA        |
| NM_001163941_cds_27_0_chr7_20761575_f_1.fwd | TGTA AACGACGGCCAGTGCAGTTCTTTGGGGACAAG         |
| NM_001163941_cds_27_0_chr7_20761575_f_2.fwd | TGTA AACGACGGCCAGTTGGTCACTCACAGGCTCTCT        |
| NM_001089_cds_0_0_chr16_2266676_r_1.fwd     | TGTA AACGACGGCCAGTCCAGTCTCGGAAAGTGAAAC        |
| NM_001089_cds_1_0_chr16_2267599_r.fwd       | TGTA AACGACGGCCAGTCCCAACACAGCAAGTATCA         |
| NM_001089_cds_2_0_chr16_2267881_r_1.fwd     | TGTA AACGACGGCCAGTATGCCTTGGTGCTCATCTT         |
| NM_001089_cds_2_0_chr16_2267881_r_2.fwd     | TGTA AACGACGGCCAGTCAAGTGGGAGAGGCCTAGGTA       |
| NM_001089_cds_3_0_chr16_2268290_r_1.fwd     | TGTA AACGACGGCCAGTTCACACTCTCCATGCTGTG         |
| NM_001089_cds_3_0_chr16_2268290_r_2.fwd     | TGTA AACGACGGCCAGTACCCGGTGTGAAACTTCC          |
| NM_001089_cds_4_0_chr16_2268945_r_1.fwd     | TGTA AACGACGGCCAGTGGGCAGTCCCTTCTCTACC         |
| NM_001089_cds_5_0_chr16_2271029_r_1.fwd     | TGTA AACGACGGCCAGTCAATACCTTGTCTCGCTGTCC       |
| NM_001089_cds_5_0_chr16_2271029_r_2.fwd     | TGTA AACGACGGCCAGTCAACCCACCTTCCGACAT          |
| NM_001089_cds_6_0_chr16_2271383_r_1.fwd     | TGTA AACGACGGCCAGTAGGCACCCAACAGAAAACAC        |
| NM_001089_cds_7_0_chr16_2273188_r_1.fwd     | TGTA AACGACGGCCAGTGAGACCATCTGGTGACAGGA        |
| NM_001089_cds_8_0_chr16_2274281_r_1.fwd     | TGTA AACGACGGCCAGTTGTGGTTCCTTGTACAGATGC       |
| NM_001089_cds_8_0_chr16_2274281_r_2.fwd     | TGTA AACGACGGCCAGTGGGACTCACTATATTTCTGCACTA    |
| NM_001089_cds_9_0_chr16_2274781_r_1.fwd     | TGTA AACGACGGCCAGTCTCTGCACAGGGCAAGGAC         |
| NM_001089_cds_9_0_chr16_2274781_r_2.fwd     | TGTA AACGACGGCCAGTGAAGATGGTCAAGCCTCGTGTA      |
| NM_001089_cds_10_0_chr16_2275444_r_2.fwd    | TGTA AACGACGGCCAGTAGCTGGTCCGGTTCTGTC          |
| NM_001089_cds_11_0_chr16_2276696_r_1.fwd    | TGTA AACGACGGCCAGTGTGGATGGTGGAGGAGGAT         |
| NM_001089_cds_11_0_chr16_2276696_r_2.fwd    | TGTA AACGACGGCCAGTGCAGCTTGACAGAAAGTTGT        |
| NM_001089_cds_12_0_chr16_2278028_r_1.fwd    | TGTA AACGACGGCCAGTCCAGGCATGTTTGATGGT          |
| NM_001089_cds_12_0_chr16_2278028_r_3.fwd    | TGTA AACGACGGCCAGTGTACTCGCCCAAGGTCAGC         |
| NM_001089_cds_13_0_chr16_2279436_r_2.fwd    | TGTA AACGACGGCCAGTCTCTGCATGGGCTTACATGA        |
| NM_001089_cds_14_0_chr16_2282142_r_1.fwd    | TGTA AACGACGGCCAGTGCATTTACTGACCGAAGGAAGAC     |

(continued)

## Supplementary Table S3. Continued

| Sequence Name                               | Sequence                                  |
|---------------------------------------------|-------------------------------------------|
| NM_001089_cds_15_0_chr16_2285592_r_1.fwd    | TGTA AACGACGGCCAGTACCCAGCCAAGCAGATTTCAT   |
| NM_001089_cds_16_0_chr16_2287331_r_1.fwd    | TGTA AACGACGGCCAGTGGCTGAACCCATCCTAACC     |
| NM_001089_cds_16_0_chr16_2287331_r_2.fwd    | TGTA AACGACGGCCAGTACCCGCTCACCGTATTCTG     |
| NM_001089_cds_17_0_chr16_2287768_r_1.fwd    | TGTA AACGACGGCCAGTGGCTTGAGTCCCTCAAGGAT    |
| NM_001089_cds_18_0_chr16_2288388_r_1.fwd    | TGTA AACGACGGCCAGTCCCTTGACGTAGCTGGACTCA   |
| NM_001089_cds_19_0_chr16_2289405_r_1.fwd    | TGTA AACGACGGCCAGTGGCTGAGATGGTGTAAAG      |
| NM_001089_cds_20_0_chr16_2290007_r_1.fwd    | TGTA AACGACGGCCAGTAGGAGGGAGCAAGGCTCAG     |
| NM_001089_cds_21_0_chr16_2293971_r_1.fwd    | TGTA AACGACGGCCAGTGTCTGAAGCGGAAGGATTA     |
| NM_001089_cds_21_0_chr16_2293971_r_2.fwd    | TGTA AACGACGGCCAGTAGAGCAGGGCATCAGAACTC    |
| NM_001089_cds_22_0_chr16_2298452_r_1.fwd    | TGTA AACGACGGCCAGTAGCTATCCAGCCCACACTCA    |
| NM_001089_cds_23_0_chr16_2307285_r_1.fwd    | TGTA AACGACGGCCAGTAGTCCAACCTTCCCCTGGT     |
| NM_001089_cds_24_0_chr16_2307650_r_1.fwd    | TGTA AACGACGGCCAGTGGACATTGACAGTCTCCTCTCC  |
| NM_001089_cds_25_0_chr16_2309583_r_1.fwd    | TGTA AACGACGGCCAGTACTAAAACCAAGCCTTTGGA    |
| NM_001089_cds_26_0_chr16_2313525_r_1.fwd    | TGTA AACGACGGCCAGTACCAAGCCAATGTCTTGAA     |
| NM_001089_cds_28_0_chr16_2316012_r_12.fwd   | TGTA AACGACGGCCAGTAGGTTAAGCGAAAGCAGTG     |
| NM_001089_cds_28_0_chr16_2316012_r_20.fwd   | TGTA AACGACGGCCAGTCCAAGGAGAGACTGCTATTACTC |
| NM_001089_cds_28_0_chr16_2316012_r_21.fwd   | TGTA AACGACGGCCAGTGTCTCACCTCGCATGTT       |
| NM_001089_cds_29_0_chr16_2316415_r.fwd      | TGTA AACGACGGCCAGTGGGCACATTTCCGACTG       |
| Reverse primers                             |                                           |
| NM_001163941_cds_1_0_chr7_20629434_f.rev    | ACGATGAGAAATTCAGAAGAGGA                   |
| NM_001163941_cds_2_0_chr7_20632705_f.rev    | GGATGTTATGCTATTTTCCCTATC                  |
| NM_001163941_cds_3_0_chr7_20634836_f_1.rev  | GCCCAGCAATATGGCAGAA                       |
| NM_001163941_cds_4_0_chr7_20638207_f.rev    | CTCTGTCAACTACAACCTCAAAGCATA               |
| NM_001163941_cds_5_0_chr7_20649332_f_1.rev  | CAAAGCTAACGTACTACAATATCATCC               |
| NM_001163941_cds_6_0_chr7_20649609_f_1.rev  | TGCATTAGCCATCTCATCTACC                    |
| NM_001163941_cds_6_0_chr7_20649609_f_2.rev  | AAGGACATCATCTATTCCATGC                    |
| NM_001163941_cds_7_0_chr7_20651904_f_1.rev  | CCTTTGCATCTTTGAGATTCTG                    |
| NM_001163941_cds_8_0_chr7_20652109_f_1.rev  | GAATTTTGGCTAAACTAGGTAAGGA                 |
| NM_001163941_cds_8_0_chr7_20652109_f_2.rev  | CAAAAGCGGAATGCAGATG                       |
| NM_001163941_cds_9_0_chr7_20653683_f_1.rev  | TTTCAATACAACACAATCTCCTCTT                 |
| NM_001163941_cds_10_0_chr7_20654116_f_1.rev | AGTTGATCCAGAGTATTGTCCA                    |
| NM_001163941_cds_11_0_chr7_20656170_f_1.rev | TATGGCTTCTCTCCAGCTC                       |
| NM_001163941_cds_12_0_chr7_20657568_f_1.rev | TGCCACCATAAGCTAAGGACA                     |
| NM_001163941_cds_12_0_chr7_20657568_f_2.rev | GCCACATTGAAAGAAGAATTGTC                   |
| NM_001163941_cds_13_0_chr7_20664654_f_1.rev | CCATCACGTAAGTTCTCAGTGG                    |
| NM_001163941_cds_14_0_chr7_20687653_f_1.rev | TTGAAACACTCCATTTCTTACTGA                  |
| NM_001163941_cds_15_0_chr7_20691844_f_1.rev | TGACACACTGATCTAGAGTGAAA                   |
| NM_001163941_cds_16_0_chr7_20704555_f_1.rev | TCCCCTTGTGGTTTAGACTGA                     |
| NM_001163941_cds_17_0_chr7_20705973_f_1.rev | CTGACCTGATATAACATGGCTTTG                  |
| NM_001163941_cds_18_0_chr7_20706206_f.rev   | GTCACACTTTTGGACTTGCTTCT                   |
| NM_001163941_cds_19_0_chr7_20710872_f.rev   | ATGTGGGTCATCTCAGCACA                      |
| NM_001163941_cds_20_0_chr7_20729164_f_1.rev | CGATGGTGATAACAGTCTTCATT                   |
| NM_001163941_cds_20_0_chr7_20729164_f_2.rev | TCTACCTTCTATCCTAAATTGGTCTGT               |
| NM_001163941_cds_21_0_chr7_20733188_f_2.rev | TTTCAGGAAAATAAGAAAATGTGC                  |
| NM_001163941_cds_22_0_chr7_20734463_f_1.rev | TCCATTTCTGGGTTCAATC                       |
| NM_001163941_cds_23_0_chr7_20745131_f_1.rev | AGTGGCCCCCAGTCTACT                        |
| NM_001163941_cds_23_0_chr7_20745131_f_2.rev | TGACATTATCTTTGACAGTITTC                   |
| NM_001163941_cds_24_0_chr7_20749025_f_1.rev | AGGACTGCTAACCCCCAGAT                      |
| NM_001163941_cds_24_0_chr7_20749025_f_2.rev | TTGTGCTTCACTTCAGAGTCTC                    |
| NM_001163941_cds_25_0_chr7_20751380_f_1.rev | CTTAGCCTTACTTGGCAGCTTTA                   |
| NM_001163941_cds_25_0_chr7_20751380_f_2.rev | GGTCGTAGGAAAATCGTCACA                     |
| NM_001163941_cds_26_0_chr7_20759508_f_1.rev | AGCCTTAATTGGAACGGTGA                      |
| NM_001163941_cds_27_0_chr7_20761575_f_1.rev | CCTTCTTTGCATTACACGAACA                    |
| NM_001163941_cds_27_0_chr7_20761575_f_2.rev | GCAGAAGTTGATGGGAAATAAA                    |
| NM_001089_cds_0_0_chr16_2266676_r_1.rev     | GCCAGAGGACTCCCAGGT                        |
| NM_001089_cds_1_0_chr16_2267599_r.rev       | CTGTGCGGAGCGTCTGTG                        |
| NM_001089_cds_2_0_chr16_2267881_r_1.rev     | CACAGCATGGAGGAGTGTGA                      |
| NM_001089_cds_2_0_chr16_2267881_r_2.rev     | CAGGAGACCCATCAGCATCT                      |

(continued)

## Supplementary Table S3. Continued

| Sequence Name                             | Sequence                |
|-------------------------------------------|-------------------------|
| NM_001089_cds_3_0_chr16_2268290_r_1.rev   | CAGCCTTATCCCCACCT       |
| NM_001089_cds_3_0_chr16_2268290_r_2.rev   | GCAGATGTCTCCCATGTAGG    |
| NM_001089_cds_4_0_chr16_2268945_r_1.rev   | GGTAGTCCCCGTGGTCCT      |
| NM_001089_cds_5_0_chr16_2271029_r_1.rev   | TGCTCTGCTTTGCGTCCA      |
| NM_001089_cds_5_0_chr16_2271029_r_2.rev   | AGATGTAGCGGACGAGAGGA    |
| NM_001089_cds_6_0_chr16_2271383_r_1.rev   | GTCTGAGTCGCACCTGTGG     |
| NM_001089_cds_7_0_chr16_2273188_r_1.rev   | GCTGTGACCTACTGGCCTTC    |
| NM_001089_cds_8_0_chr16_2274281_r_1.rev   | TCCAGCGCAGACTGATCTTA    |
| NM_001089_cds_8_0_chr16_2274281_r_2.rev   | GGCCCAGTTCATGCTCAC      |
| NM_001089_cds_9_0_chr16_2274781_r_1.rev   | GCCGAGGTGGTGTITAG       |
| NM_001089_cds_9_0_chr16_2274781_r_2.rev   | TGCACCCTCAGCCTTACC      |
| NM_001089_cds_10_0_chr16_2275444_r_2.rev  | CATGGTGCTTGTGCTCTCC     |
| NM_001089_cds_11_0_chr16_2276696_r_1.rev  | GTGACCTGGAGGAGTCTTGA    |
| NM_001089_cds_11_0_chr16_2276696_r_2.rev  | CAGCTCCTTCCCGGTTCT      |
| NM_001089_cds_12_0_chr16_2278028_r_1.rev  | GCGCGAGTGGAAAATGTT      |
| NM_001089_cds_12_0_chr16_2278028_r_3.rev  | AAAATAGTGCCAACGTGCAG    |
| NM_001089_cds_13_0_chr16_2279436_r_2.rev  | ATGGTGGCCGGAGACACT      |
| NM_001089_cds_14_0_chr16_2282142_r_1.rev  | GTTCAAGTGTCTCTGCTCT     |
| NM_001089_cds_15_0_chr16_2285592_r_1.rev  | CTCCGGTCTCTAGCCTCCT     |
| NM_001089_cds_16_0_chr16_2287331_r_1.rev  | TCCCTCCAGGTGCTGATACT    |
| NM_001089_cds_16_0_chr16_2287331_r_2.rev  | GACTGGAGGCAGTGGGTTT     |
| NM_001089_cds_17_0_chr16_2287768_r_1.rev  | CCTCTACCAGAACCTTGCT     |
| NM_001089_cds_18_0_chr16_2288388_r_1.rev  | CAGTGGGAGTGGGGTTCC      |
| NM_001089_cds_19_0_chr16_2289405_r_1.rev  | AGGGTGTCTGGGACGTGTT     |
| NM_001089_cds_20_0_chr16_2290007_r_1.rev  | CCTTCACAGGGATGAACAAG    |
| NM_001089_cds_21_0_chr16_2293971_r_1.rev  | GGCCACTTCTGATGTGTC      |
| NM_001089_cds_21_0_chr16_2293971_r_2.rev  | TGAATGAGCTGTTGCTGGTC    |
| NM_001089_cds_22_0_chr16_2298452_r_1.rev  | GTAGGGGGTTGCTGTACCT     |
| NM_001089_cds_23_0_chr16_2307285_r_1.rev  | TTTGTGGTCAGAGACTTCAGAGA |
| NM_001089_cds_24_0_chr16_2307650_r_1.rev  | CAGGAGTTTGAGCAAGATGAG   |
| NM_001089_cds_25_0_chr16_2309583_r_1.rev  | CATCTTCCCCCATGGAC       |
| NM_001089_cds_26_0_chr16_2313525_r_1.rev  | CGGGGGAGTGGTGTGTTCT     |
| NM_001089_cds_28_0_chr16_2316012_r_12.rev | GCTCTGACCCTGCCATTCT     |
| NM_001089_cds_28_0_chr16_2316012_r_20.rev | CCTGCCATTGCTGTTTTCTG    |
| NM_001089_cds_28_0_chr16_2316012_r_21.rev | CCTCCTCTGGAAGAACTACCC   |
